# Supplementary material for: Tunable lattice dynamics and dielectric functions of two-dimensional Bi2O2Se: striking layer and temperature dependent effects
Source: Royal Society of Chemistry journal article supplement (doi:10.1039/d2nr05775a), 2022-12-26
Supplement: d2nr05775a1.pdf [file d2nr05775a1.pdf]

## Electronic Supplementary Information

### **Tunable lattice dynamics and dielectric functions of two-dimensional Bi<sub>2</sub>O<sub>2</sub>Se: Striking layer and temperature dependent effects**

Yafang Li,<sup>a</sup> Kai Dai,<sup>a</sup> Lichen Gao,<sup>a</sup> Jinzhong Zhang,<sup>\*a</sup> Anyang Cui,<sup>a</sup> Kai Jiang,<sup>a</sup> Yawei Li,<sup>a</sup> Liyan Shang,<sup>a</sup>  
Liangqing Zhu<sup>a</sup> and Zhigao Hu<sup>\*a,b</sup>

<sup>a</sup> Technical Center for Multifunctional Magneto-Optical Spectroscopy (Shanghai), Engineering Research Center of Nanophotonics & Advanced Instrument (Ministry of Education), Department of Physics, School of Physics and Electronic Science, East China Normal University, Shanghai 200241, China

<sup>b</sup> Collaborative Innovation Center of Extreme Optics, Shanxi University, Taiyuan, Shanxi 030006, China

\* Correspondence: (J. Z. Zhang) [jzzhang@ee.ecnu.edu.cn](mailto:jzzhang@ee.ecnu.edu.cn); (Z.G. Hu) [zghu@ee.ecnu.edu.cn](mailto:zghu@ee.ecnu.edu.cn)

#### **List of Contents:**

##### **Supplementary Note 1**

1. Optical microscope images
2. AFM images

##### **Supplementary Note 2**

XPS survey spectrum

##### **Supplementary Note 3**

Angle-resolved polarized Raman spectroscopy (ARPR)

##### **Supplementary Note 4**

Layer-dependent bandgap

##### **Supplementary Note 5**

Temperature-dependent Raman spectroscopy

##### **Supplementary Note 6**

Spectroscopic ellipsometry analysis

## Supplementary Note 1

### 1. Optical microscope images:

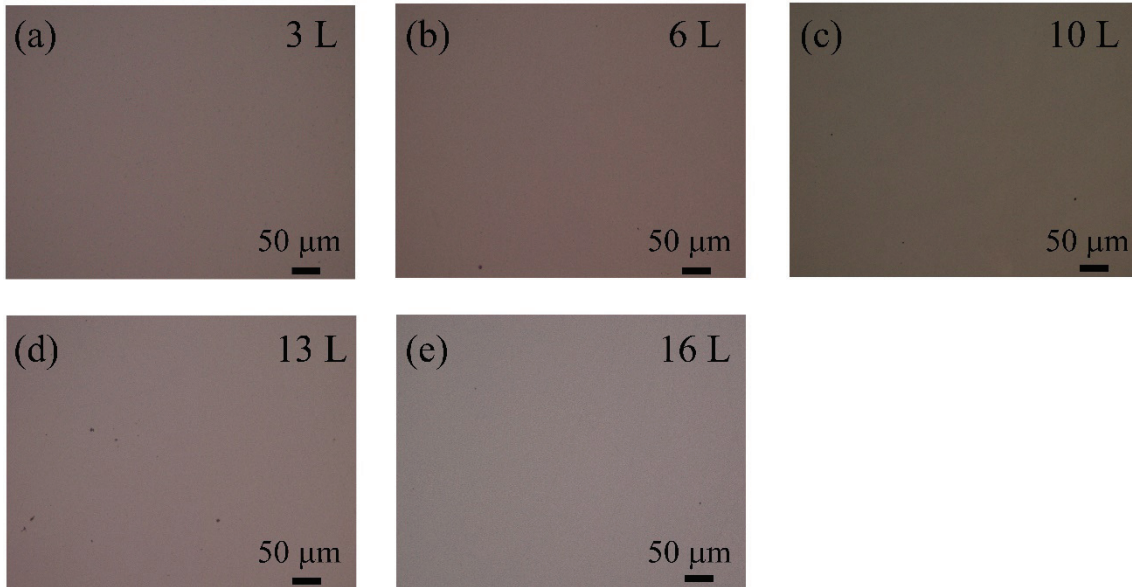

**Fig. S1.** (a)-(e) The basic optical microscope images of 3 L, 6 L, 10 L, 13 L, and 16 L Bi<sub>2</sub>O<sub>2</sub>Se films under 20× objective, respectively.

### 2. AFM images:

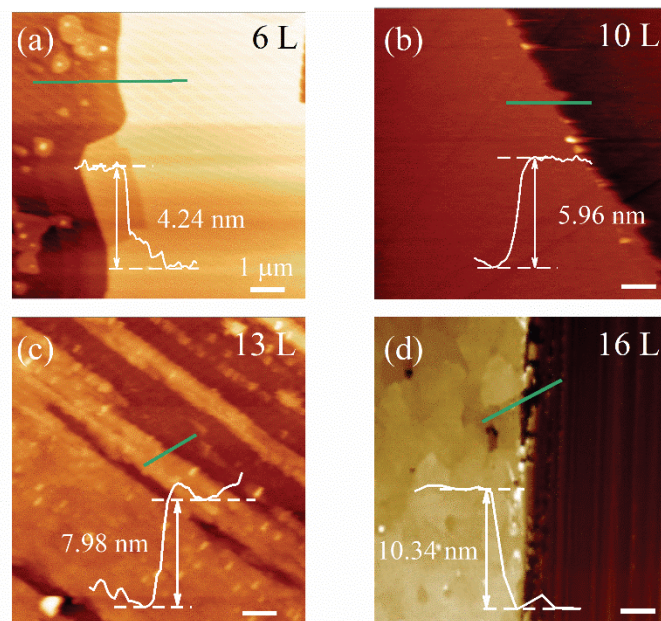

**Fig. S2.** (a)-(d) The AFM images of 6 L, 10 L, 13 L, and 16 L Bi<sub>2</sub>O<sub>2</sub>Se films, respectively.

## Supplementary Note 2

XPS survey spectrum:

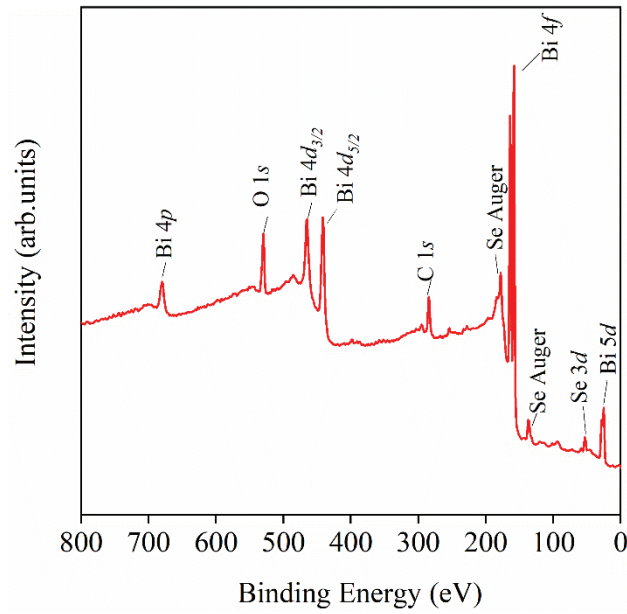

Fig. S3. The XPS survey spectrum of 10 L Bi<sub>2</sub>O<sub>2</sub>Se film.

## Supplementary Note 3

Angle-resolved polarized Raman spectroscopy (ARPR):

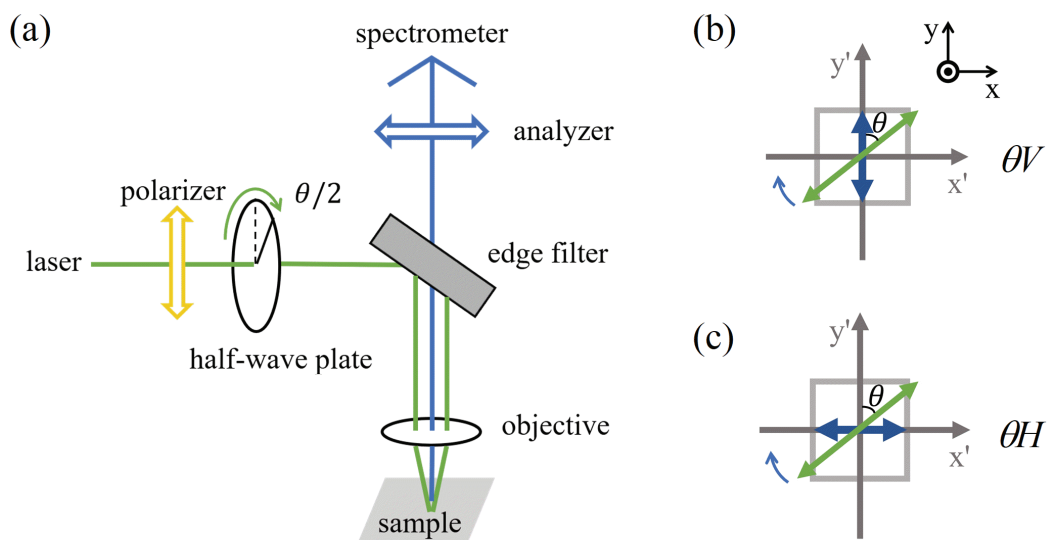

Fig. S4. (a) The schematic diagram of polarized Raman spectroscopy configuration. The schematic diagram of (b)  $\theta V$  and (c)  $\theta H$  configuration, respectively.

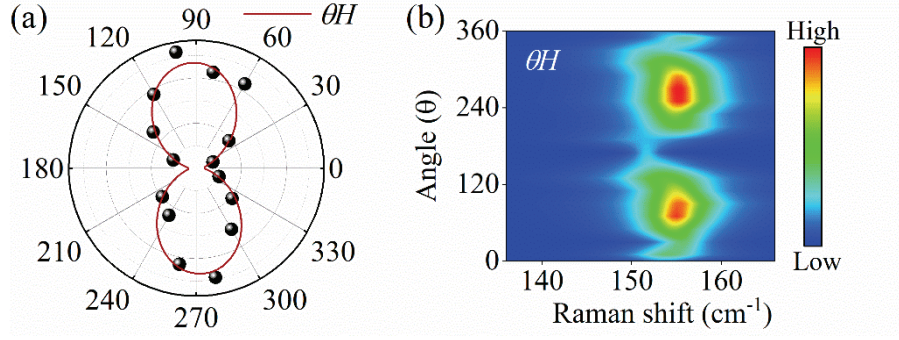

**Fig. S5.** (a) The polar plots and fitted intensities of  $A_{1g}$  Raman mode as the function of angles with  $\theta H$  configuration. (b) The polarized Raman mapping under  $\theta H$  configuration.

The ARPR measurement was carried out to further investigate the phonon anisotropy of 2D  $\text{Bi}_2\text{O}_2\text{Se}$ . As shown in Fig. S4, the half-wave plate was applied to change the polarization direction of incident light. The sample was kept stationary while rotating the half-wave plate in 20 steps. The analyzer can be selectively set to obtain the Raman scattering signals under the  $\theta V$  or  $\theta H$  configuration.

In these two polarized Raman configurations, the laboratory coordinates ( $x, y, z$ ) which represented by black arrows coincides with crystal coordinates ( $x', y', z'$ ) referred as gray arrows in Fig. S4. In this case, by rotating the laser polarization direction, there is an angle ( $\theta$ ) between the laser polarization direction and one axis of the crystal coordinates. Furthermore, the incident laser polarization is rotated  $\theta$  when the half-wave plate rotating  $\theta/2$ . As shown in Fig. S4b-c, the green arrows refer to the polarization direction of incident laser reaching the sample. The blue arrows represent vertical or horizontal direction of Raman signal selected by the analyzer before the spectrometer entrance. When  $\theta = 0$ , they correspond to the normal parallel (VV) and cross (VH) polarized Raman measurements, respectively. Therefore, the typical polarization configuration provides a convenient method to study crystal orientation and phonon anisotropy.

According to the Raman selection rules, the Raman intensity can be expressed as

$$I \propto |\hat{e}_S \cdot R \cdot \hat{e}_L|^2 \quad (1)$$

Where  $\hat{e}_S$  and  $\hat{e}_L$  represent the polarization vector of the Stokes scatter light and excitation light respectively, the  $R$  is the Raman tensor of one Raman mode.

The Raman tensors of  $A_{1g}$  mode is:

$$\begin{pmatrix} a & 0 & 0 \\ 0 & a & 0 \\ 0 & 0 & b \end{pmatrix}$$

In our ARPR measurement,  $\hat{e}_L$  can be written as  $(\sin \theta, \cos \theta, 0)$  for both two configurations, where  $\theta$  denotes

the angle between the  $y$  axis and polarization direction. The  $\hat{e}_s$  should be written as  $(0, 1, 0)$  for  $\theta V$  and  $(1, 0, 0)$  for  $\theta H$  configuration.

As a result, the Raman intensity of  $A_{1g}$  mode for  $\theta V$  follows the formula:

$$I_{\theta V} \propto \left| (0 \ 1 \ 0) \begin{pmatrix} a & 0 & 0 \\ 0 & a & 0 \\ 0 & 0 & b \end{pmatrix} \begin{pmatrix} \sin \theta \\ \cos \theta \\ 0 \end{pmatrix} \right|^2 = a^2 \cos^2 \theta \quad (2)$$

And for  $\theta H$  follows:

$$I_{\theta H} \propto \left| (1 \ 0 \ 0) \begin{pmatrix} a & 0 & 0 \\ 0 & a & 0 \\ 0 & 0 & b \end{pmatrix} \begin{pmatrix} \sin \theta \\ \cos \theta \\ 0 \end{pmatrix} \right|^2 = a^2 \sin^2 \theta \quad (3)$$

## Supplementary Note 4

### Layer-dependent bandgap:

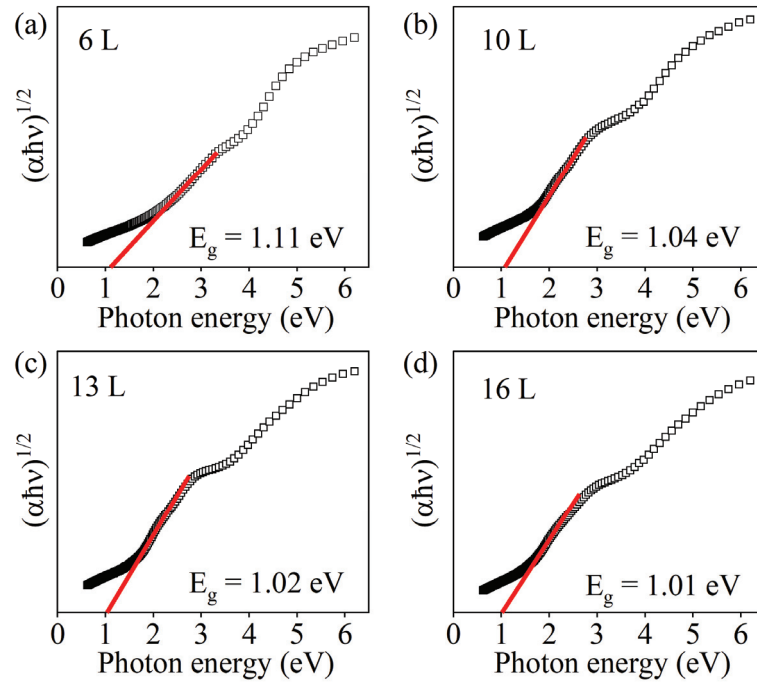

**Fig. S6.** (a)-(d) The Tauc plots of 6 L, 10 L, 13 L, and 16 L  $\text{Bi}_2\text{O}_2\text{Se}$  films.

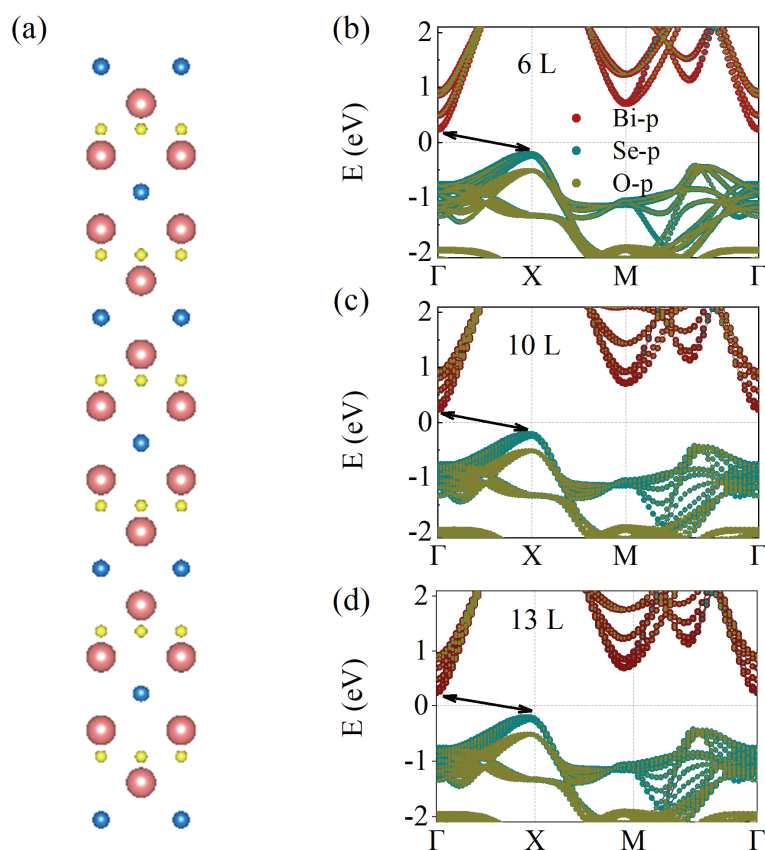

**Fig. S7.** (a) Atomic structure of 6 L Bi<sub>2</sub>O<sub>2</sub>Se calculated mode. (Pink, yellow, and blue balls correspond to Bi, O and Se atoms, respectively.) (b)-(d) The band structures of 6 L, 10 L, and 13 L Bi<sub>2</sub>O<sub>2</sub>Se films, respectively, while the dispersions of red, green, and yellow circles represent the contributions by Bi-*p*, Se-*p*, and O-*p* orbitals, respectively.

## Supplementary Note 5

### Temperature-dependent Raman spectroscopy

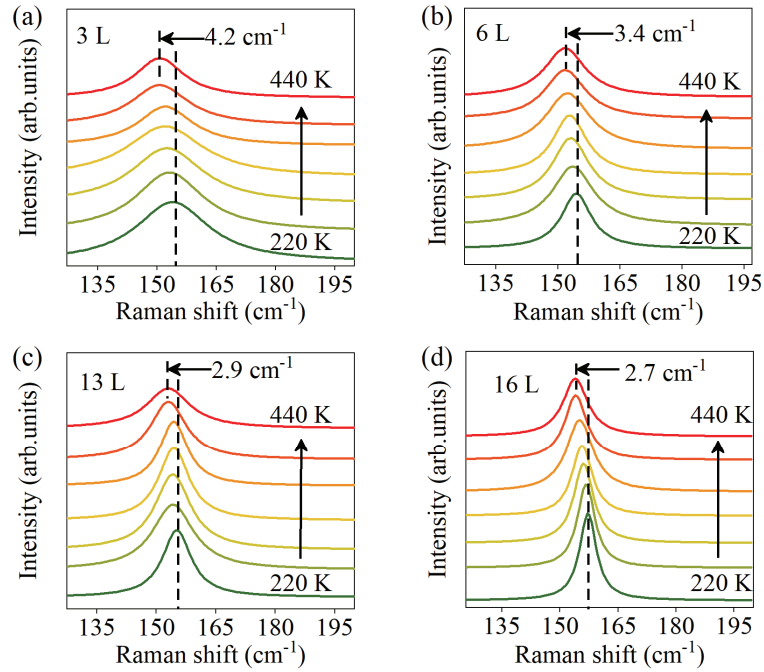

Fig. S8. The Raman spectra of (a) 3 L, (b) 6 L, (c) 13 L, and (d) 16 L  $\text{Bi}_2\text{O}_2\text{Se}$  from 220 K-440 K.

## Supplementary Note 6

### Spectroscopic ellipsometry analysis:

In this work, the spectra measured at different incident angles ( $60^\circ$ ,  $65^\circ$ , and  $70^\circ$ ) have been fitted and shown in Fig. S8. The root means square error (RMSE) can evaluate the goodness of the SE fitted results, which is defined as:

$$\text{RMSE} = \sqrt{\frac{1}{2M-P} \sum_{i=1}^M \left[ (\Psi_{mea}^i - \Psi_{fit}^i)^2 + (\Delta_{mea}^i - \Delta_{fit}^i)^2 \right]} \quad (2)$$

$M$  is the number of data points, and  $P$  is the number of unknown model parameters.  $\Psi_{mea}^i$  and  $\Psi_{fit}^i$  represent the  $i$ th measured and fitted amplitude,  $\Delta_{mea}^i$  and  $\Delta_{fit}^i$  represent the  $i$ th measured and fitted phase. Consequently, the RMSE values are 7.46, 1.58, 1.68, 7.31, and 4.71 of 3-16 L, respectively, which suggest reliable results.

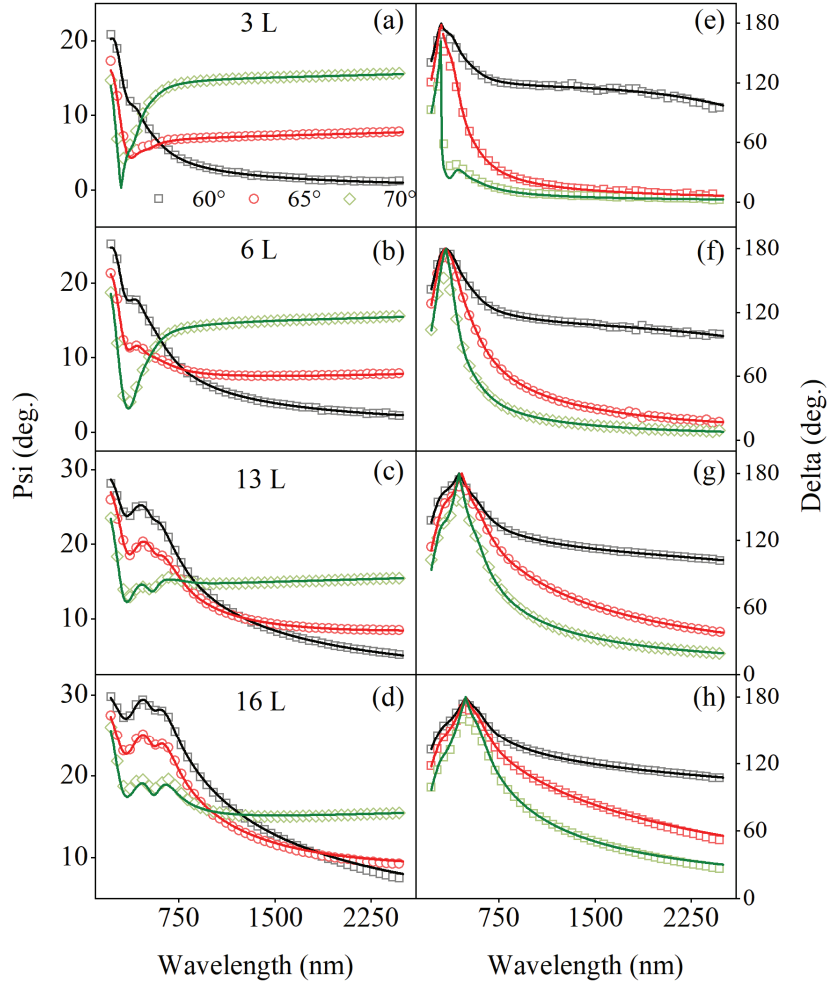

**Fig. S9.** The measured (symbols) and best-fitted (lines) Psi (a-d) and Delta (e-h) curves for 3 L, 6 L, 13 L, and 16 L  $\text{Bi}_2\text{O}_2\text{Se}$  films at  $60^\circ$ ,  $65^\circ$ ,  $70^\circ$  azimuthal orientation, respectively.

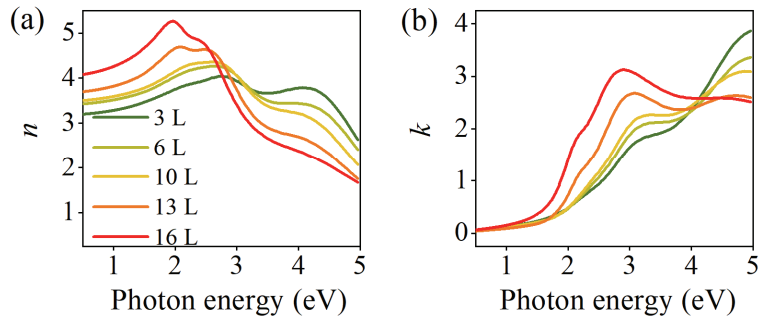

**Fig. S10.** The refractive index (a) and extinction coefficient (b) of  $\text{Bi}_2\text{O}_2\text{Se}$  films, respectively.

**Table S1.** The thickness of  $\text{Bi}_2\text{O}_2\text{Se}$  films measured by AFM and SE

| Layer number   |     | 3 L  | 6 L  | 10 L | 13 L | 16 L  |
|----------------|-----|------|------|------|------|-------|
| Thickness (nm) | AFM | 1.94 | 4.24 | 5.96 | 7.98 | 10.34 |
|                | SE  | 2.12 | 3.81 | 5.83 | 7.95 | 9.88  |



**Table S2.** The parameters of SCP transitions well model for ultrathin Bi<sub>2</sub>O<sub>2</sub>Se films

| Exciton | Parameters      | 3 L              | 6 L              | 10 L             | 13 L             | 16 L             |
|---------|-----------------|------------------|------------------|------------------|------------------|------------------|
| $E_a$   | $A_0$           | 0.95<br>(0.03)   | 0.97<br>(0.02)   | 0.83<br>(0.04)   | 1.48<br>(0.01)   | 2.53<br>(0.01)   |
|         | $\Phi_0$ (deg)  | 140.21<br>(0.02) | 140.22<br>(0.04) | 140.59<br>(0.02) | 141.20<br>(0.01) | 141.01<br>(0.04) |
|         | $E_0$ (eV)      | 2.21<br>(0.02)   | 2.19<br>(0.01)   | 2.12<br>(0.01)   | 2.09<br>(0.01)   | 2.04<br>(0.02)   |
|         | $\Gamma_0$ (eV) | 0.57<br>(0.01)   | 0.47<br>(0.01)   | 0.38<br>(0.07)   | 0.27<br>(0.01)   | 0.27<br>(0.03)   |
|         | $A_1$           | 3.41<br>(0.04)   | 4.55<br>(0.03)   | 6.73<br>(0.27)   | 10.23<br>(0.01)  | 9.89<br>(0.02)   |
| $E_b$   | $\Phi_1$ (deg)  | 134.64<br>(0.16) | 134.66<br>(0.47) | 134.52<br>(0.38) | 134.46<br>(0.58) | 134.35<br>(0.28) |
|         | $E_1$ (eV)      | 2.96<br>(0.19)   | 2.93<br>(0.08)   | 2.84<br>(0.16)   | 2.71<br>(0.11)   | 2.48<br>(0.07)   |
|         | $\Gamma_1$ (eV) | 0.56<br>(0.10)   | 0.59<br>(0.05)   | 0.58<br>(0.03)   | 0.52<br>(0.05)   | 0.52<br>(0.04)   |
|         | $A_2$           | 18.35<br>(0.21)  | 14.63<br>(0.16)  | 11.78<br>(0.60)  | 9.31<br>(0.04)   | 8.55<br>(0.08)   |
|         | $\Phi_2$ (deg)  | 128.67<br>(0.43) | 128.75<br>(0.28) | 128.73<br>(0.10) | 127.71<br>(0.04) | 129.55<br>(0.03) |
| $E_c$   | $E_2$ (eV)      | 4.58<br>(0.05)   | 4.54<br>(0.04)   | 4.47<br>(0.05)   | 4.08<br>(0.03)   | 4.02<br>(0.05)   |
|         | $\Gamma_2$ (eV) | 0.93<br>(0.03)   | 0.97<br>(0.04)   | 1.01<br>(0.05)   | 0.98<br>(0.07)   | 1.62<br>(0.16)   |

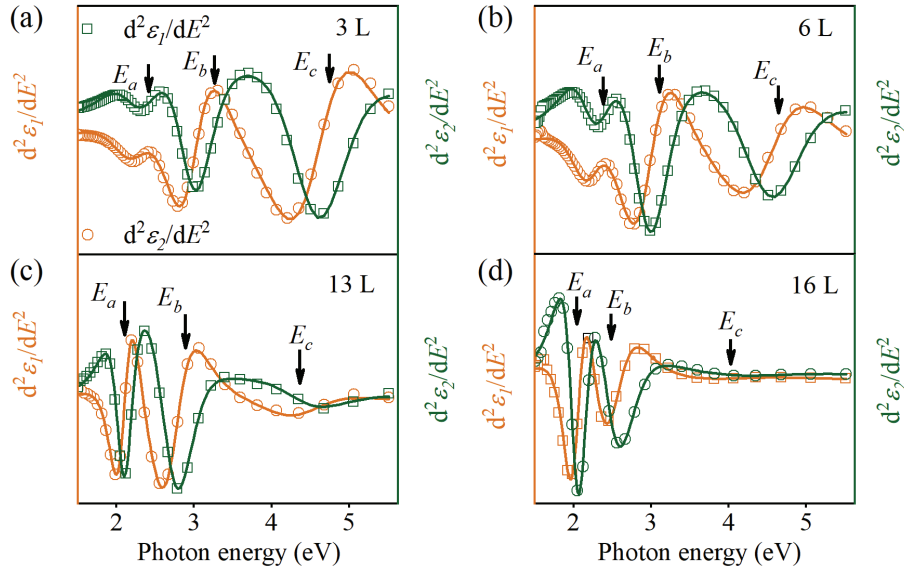

**Fig. S11.** (a)-(d) The second derivatives of the dielectric functions spectra (symbols) and the best-fitted spectra (lines) of 3 L, 6 L, 13 L, and 16 L Bi<sub>2</sub>O<sub>2</sub>Se film respectively. Three CPs including  $E_a$ ,  $E_b$ , and  $E_c$  are marked by arrows.

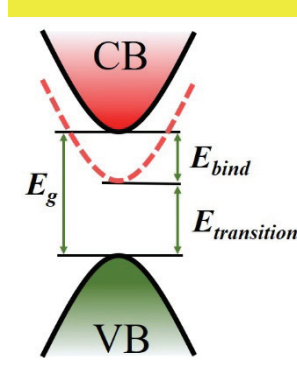

Fig. S12. The schematic diagram of the default local electronic band structure of 2D Bi<sub>2</sub>O<sub>2</sub>Se.

Table S3. The parameters of SCP model for ultrathin Bi<sub>2</sub>O<sub>2</sub>Se films at 230, 380, and 470 K, respectively

| Samples | 3L              |                 |                 | 6L              |                 |                 | 10L             |                 |                | 13L            |                 |                 | 16L             |                |                |                |
|---------|-----------------|-----------------|-----------------|-----------------|-----------------|-----------------|-----------------|-----------------|----------------|----------------|-----------------|-----------------|-----------------|----------------|----------------|----------------|
| T (K)   | 230             | 380             | 470             | 230             | 380             | 470             | 230             | 380             | 470            | 230            | 380             | 470             | 230             | 380            | 470            |                |
| $E_a$   | $A_0$           | 0.15<br>(0.04)  | 1.01<br>(0.01)  | 0.22<br>(0.06)  | 2.22<br>(0.03)  | 0.38<br>(0.04)  | 0.52<br>(0.02)  | 1.31<br>(0.02)  | 0.69<br>(0.01) | 0.65<br>(0.02) | 2.28<br>(0.01)  | 2.05<br>(0.02)  | 2.06<br>(0.01)  | 4.10<br>(0.01) | 3.49<br>(0.01) | 2.75<br>(0.01) |
|         | $\Phi_0$ (deg)  | 140.3<br>(0.1)  | 140.2<br>(0.1)  | 141.2<br>(0.1)  | 140.9<br>(0.1)  | 140.8<br>(0.1)  | 140.3<br>(0.1)  | 140.7<br>(0.1)  | 141.0<br>(0.1) | 140.9<br>(0.1) | 141.2<br>(0.1)  | 141.0<br>(0.1)  | 141.1<br>(0.1)  | 141.2<br>(0.1) | 141.0<br>(0.1) | 140.9<br>(0.1) |
|         | $E_0$ (eV)      | 2.48<br>(0.01)  | 2.21<br>(0.01)  | 2.12<br>(0.04)  | 2.46<br>(0.02)  | 2.26<br>(0.07)  | 2.23<br>(0.01)  | 2.29<br>(0.03)  | 2.25<br>(0.01) | 2.22<br>(0.01) | 2.16<br>(0.02)  | 2.12<br>(0.03)  | 2.11<br>(0.02)  | 2.10<br>(0.02) | 2.07<br>(0.02) | 2.05<br>(0.02) |
|         | $\Gamma_0$ (eV) | 0.45<br>(0.02)  | 0.55<br>(0.01)  | 0.23<br>(0.01)  | 0.66<br>(0.02)  | 0.29<br>(0.05)  | 0.37<br>(0.01)  | 0.42<br>(0.01)  | 0.33<br>(0.01) | 0.33<br>(0.01) | 0.30<br>(0.03)  | 0.31<br>(0.04)  | 0.31<br>(0.03)  | 0.32<br>(0.04) | 0.32<br>(0.04) | 0.32<br>(0.03) |
|         | $A_1$           | 10.41<br>(0.16) | 3.66<br>(0.02)  | 3.44<br>(0.01)  | 3.90<br>(0.06)  | 5.68<br>(0.06)  | 4.70<br>(0.05)  | 5.94<br>(0.05)  | 6.91<br>(0.04) | 6.77<br>(0.04) | 10.47<br>(0.03) | 10.18<br>(0.04) | 10.18<br>(0.03) | 7.58<br>(0.01) | 8.26<br>(0.02) | 8.73<br>(0.02) |
| $E_b$   | $\Phi_1$ (deg)  | 135.2<br>(0.2)  | 134.8<br>(0.1)  | 134.9<br>(0.1)  | 135.1<br>(0.1)  | 134.3<br>(0.1)  | 134.3<br>(0.1)  | 134.5<br>(0.1)  | 134.3<br>(0.1) | 134.2<br>(0.1) | 134.5<br>(0.1)  | 134.4<br>(0.1)  | 134.3<br>(0.1)  | 134.6<br>(0.1) | 134.5<br>(0.1) | 134.5<br>(0.1) |
|         | $E_1$ (eV)      | 3.19<br>(0.25)  | 2.87<br>(0.10)  | 2.75<br>(0.06)  | 3.12<br>(0.29)  | 2.79<br>(0.40)  | 2.80<br>(0.34)  | 2.91<br>(0.33)  | 2.78<br>(0.30) | 2.74<br>(0.30) | 2.65<br>(0.03)  | 2.61<br>(0.05)  | 2.59<br>(0.03)  | 2.57<br>(0.10) | 2.52<br>(0.13) | 2.48<br>(0.17) |
|         | $\Gamma_1$ (eV) | 0.85<br>(0.04)  | 0.55<br>(0.01)  | 0.52<br>(0.04)  | 0.57<br>(0.01)  | 0.64<br>(0.03)  | 0.62<br>(0.06)  | 0.56<br>(0.05)  | 0.63<br>(0.04) | 0.65<br>(0.06) | 0.49<br>(0.09)  | 0.53<br>(0.06)  | 0.56<br>(0.02)  | 0.41<br>(0.06) | 0.46<br>(0.08) | 0.52<br>(0.08) |
|         | $A_2$           | 20.06<br>(0.01) | 21.12<br>(0.08) | 26.53<br>(0.02) | 13.26<br>(0.02) | 11.53<br>(0.04) | 12.29<br>(0.07) | 10.98<br>(0.02) | 9.35<br>(0.02) | 9.80<br>(0.20) | 3.61<br>(0.10)  | 4.34<br>(0.02)  | 3.58<br>(0.02)  | 5.76<br>(0.01) | 4.36<br>(0.14) | 6.72<br>(0.12) |
| $E_c$   | $\Phi_2$ (deg)  | 128.8<br>(0.1)  | 128.7<br>(0.6)  | 128.8<br>(0.1)  | 128.7<br>(0.5)  | 128.4<br>(0.1)  | 128.7<br>(0.1)  | 128.6<br>(0.3)  | 128.4<br>(0.7) | 128.5<br>(0.3) | 127.7<br>(0.5)  | 128.7<br>(0.1)  | 128.4<br>(0.1)  | 130.3<br>(0.1) | 129.4<br>(0.2) | 129.6<br>(0.2) |
|         | $E_2$ (eV)      | 4.65<br>(0.03)  | 4.59<br>(0.18)  | 4.57<br>(0.16)  | 4.60<br>(0.04)  | 4.56<br>(0.02)  | 4.56<br>(0.08)  | 4.49<br>(0.03)  | 4.45<br>(0.05) | 4.45<br>(0.07) | 3.99<br>(0.05)  | 4.19<br>(0.06)  | 4.07<br>(0.04)  | 4.15<br>(0.01) | 4.34<br>(0.06) | 4.57<br>(0.08) |
|         | $\Gamma_2$ (eV) | 0.89<br>(0.02)  | 1.01<br>(0.04)  | 1.29<br>(0.02)  | 0.91<br>(0.01)  | 1.03<br>(0.02)  | 1.02<br>(0.01)  | 0.94<br>(0.01)  | 0.96<br>(0.01) | 0.97<br>(0.02) | 0.89<br>(0.05)  | 1.03<br>(0.02)  | 0.93<br>(0.08)  | 1.49<br>(0.03) | 1.28<br>(0.05) | 1.57<br>(0.03) |
|         | $A_3$           | 10.41<br>(0.16) | 3.66<br>(0.02)  | 3.44<br>(0.01)  | 3.90<br>(0.06)  | 5.68<br>(0.06)  | 4.70<br>(0.05)  | 5.94<br>(0.05)  | 6.91<br>(0.04) | 6.77<br>(0.04) | 10.47<br>(0.03) | 10.18<br>(0.04) | 10.18<br>(0.03) | 7.58<br>(0.01) | 8.26<br>(0.02) | 8.73<br>(0.02) |

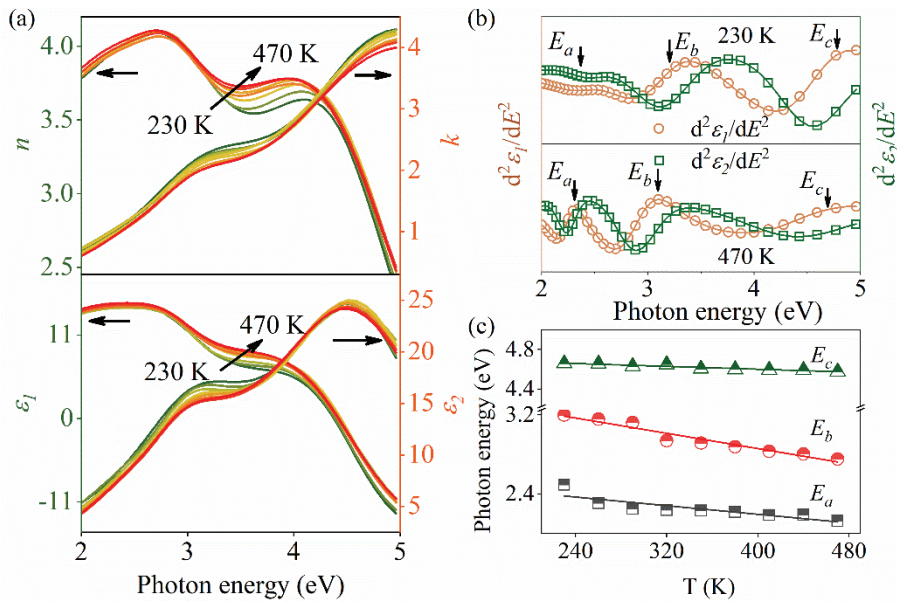

Fig. S13. (a) The refractive index, extinction coefficient, the real parts and the imaginary parts of dielectric function

of 3 L Bi<sub>2</sub>O<sub>2</sub>Se film from 230-470 K temperature. (b) The second derivatives of the dielectric functions spectra (symbols) and the best-fitted spectra (lines) of 3 L Bi<sub>2</sub>O<sub>2</sub>Se at 230 K and 470 K, respectively. Three CPs including  $E_a$ ,  $E_b$ , and  $E_c$  are marked by arrows. (c) The center energies of three CPs versus temperature.

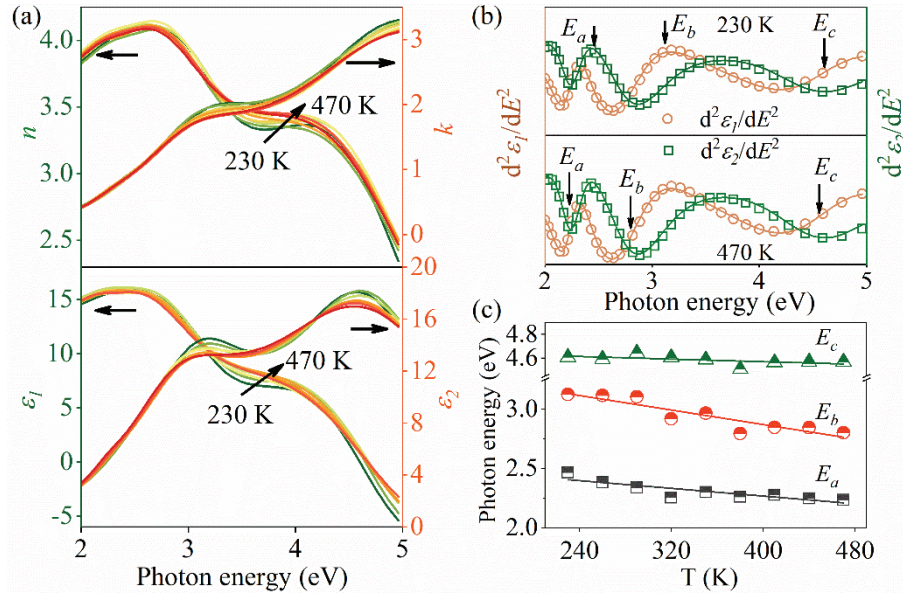

**Fig. S14.** (a) The refractive index, extinction coefficient, the real parts and the imaginary parts of dielectric function of 6 L Bi<sub>2</sub>O<sub>2</sub>Se film from 230-470 K temperature. (b) The second derivatives of the dielectric functions spectra (symbols) and the best-fitted spectra (lines) of 6 L Bi<sub>2</sub>O<sub>2</sub>Se at 230 K and 470 K, respectively. Three CPs including  $E_a$ ,  $E_b$ , and  $E_c$  are marked by arrows. (c) The center energies of three CPs versus temperature.

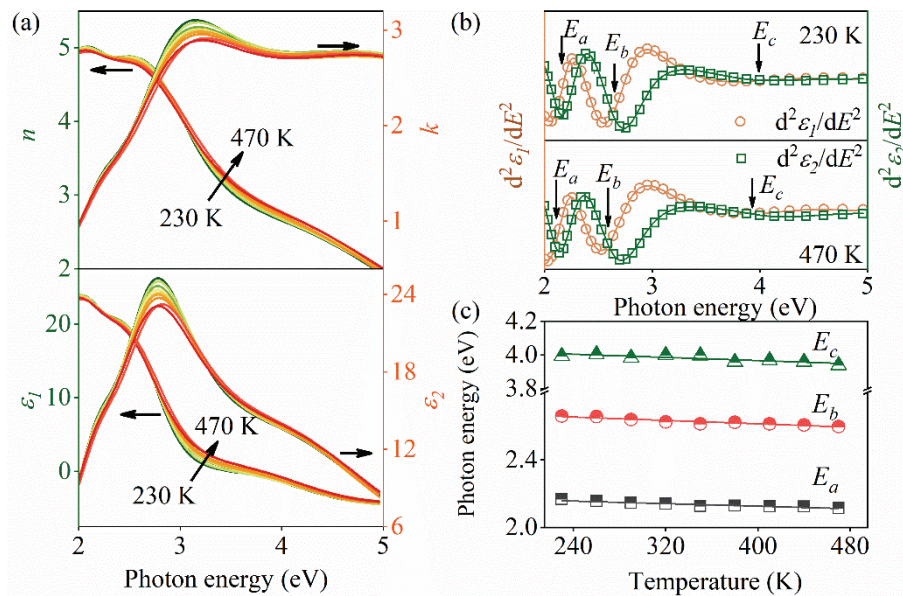

**Fig. S15.** (a) The refractive index, extinction coefficient, the real parts and the imaginary parts of dielectric function

of 13 L Bi<sub>2</sub>O<sub>2</sub>Se film from 230-470 K temperature. (b) The second derivatives of the dielectric functions spectra (symbols) and the best-fitted spectra (lines) of 13 L Bi<sub>2</sub>O<sub>2</sub>Se at 230 K and 470 K, respectively. Three CPs including  $E_a$ ,  $E_b$ , and  $E_c$  are marked by arrows. (c) The center energies of three CPs versus temperature.

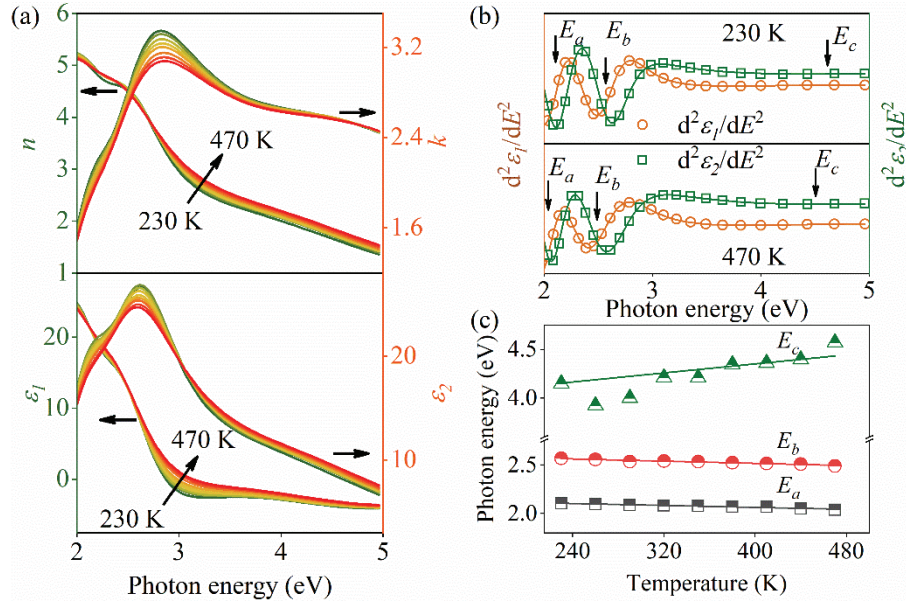

**Fig. S16.** (a) The refractive index, extinction coefficient, the real parts and the imaginary parts of dielectric function of 16 L Bi<sub>2</sub>O<sub>2</sub>Se films from 230-470 K temperature. (b) The second derivatives of the dielectric functions spectra (symbols) and the best-fitted spectra (lines) of 16 L Bi<sub>2</sub>O<sub>2</sub>Se at 230 K and 470 K, respectively. Three CPs including  $E_a$ ,  $E_b$ , and  $E_c$  are marked by arrows. (c) The center energies of three CPs versus temperature.

**Table S4.** The temperature coefficient ( $-dE/dT$ ) values of three CPs in Bi<sub>2</sub>O<sub>2</sub>Se films

| Samples | $E_a (\times 10^{-4} \text{ eV/K})$ | $E_b (\times 10^{-4} \text{ eV/K})$ | $E_c (\times 10^{-4} \text{ eV/K})$ |
|---------|-------------------------------------|-------------------------------------|-------------------------------------|
| 3 L     | -7.79                               | -19.30                              | -3.61                               |
| 6 L     | -7.29                               | -15.30                              | -3.28                               |
| 10 L    | -2.83                               | -8.47                               | -1.46                               |
| 13 L    | -2.72                               | -3.30                               | -2.43                               |
| 16 L    | -2.47                               | -2.83                               | —                                   |
